# Supplementary material for: Assessment of peak tsunami amplitude associated with a great earthquake occurring along the southernmost Ryukyu subduction zone for Taiwan region
Source: Copernicus journal article supplement (doi:10.5194/nhess-2017-336), 2017-11-06
Supplement: Supplementary file 1 [file nhess-2017-336-supplement.pdf]

Supplement shows the rest of time series recordings (Station 1 to 24 and 28 to 30).

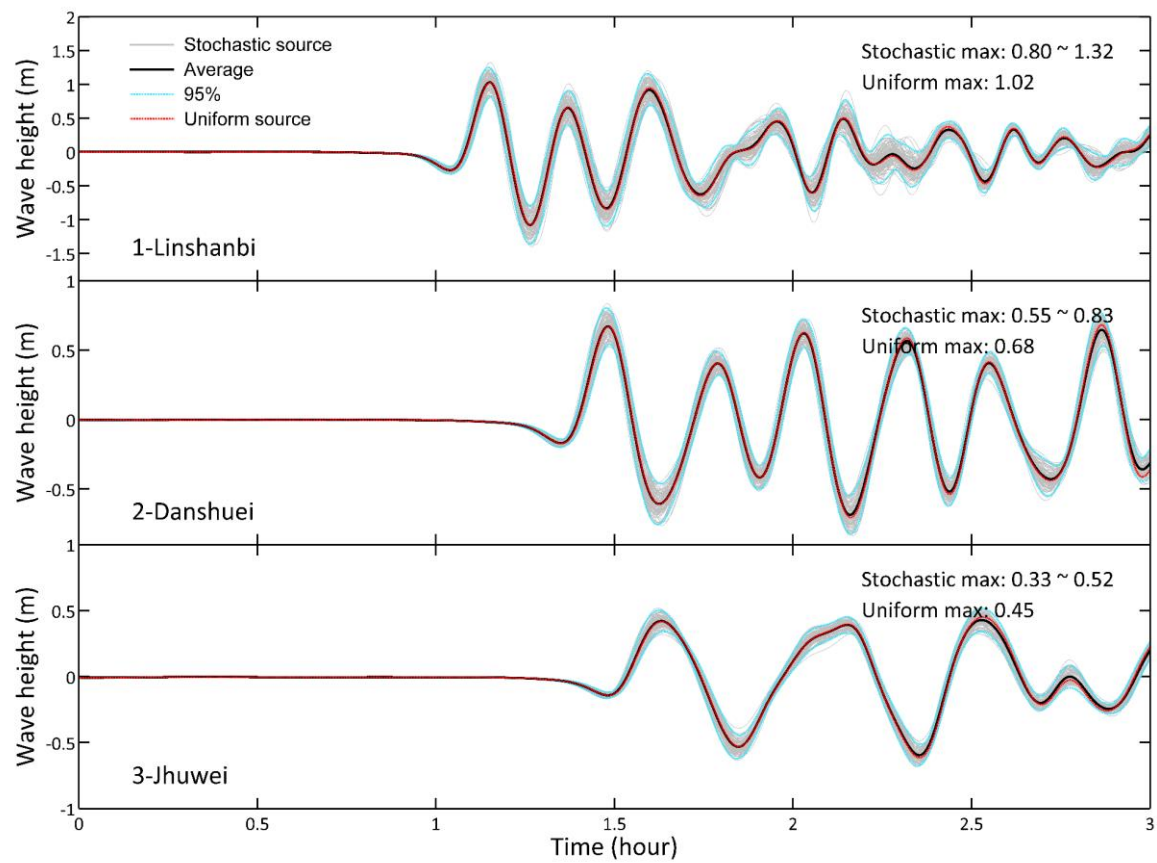

**Fig. 1.** The time series of wave heights recorded at station 1 (Linshanbi), 2 (Danshuei) and 3 (Jhuwei).

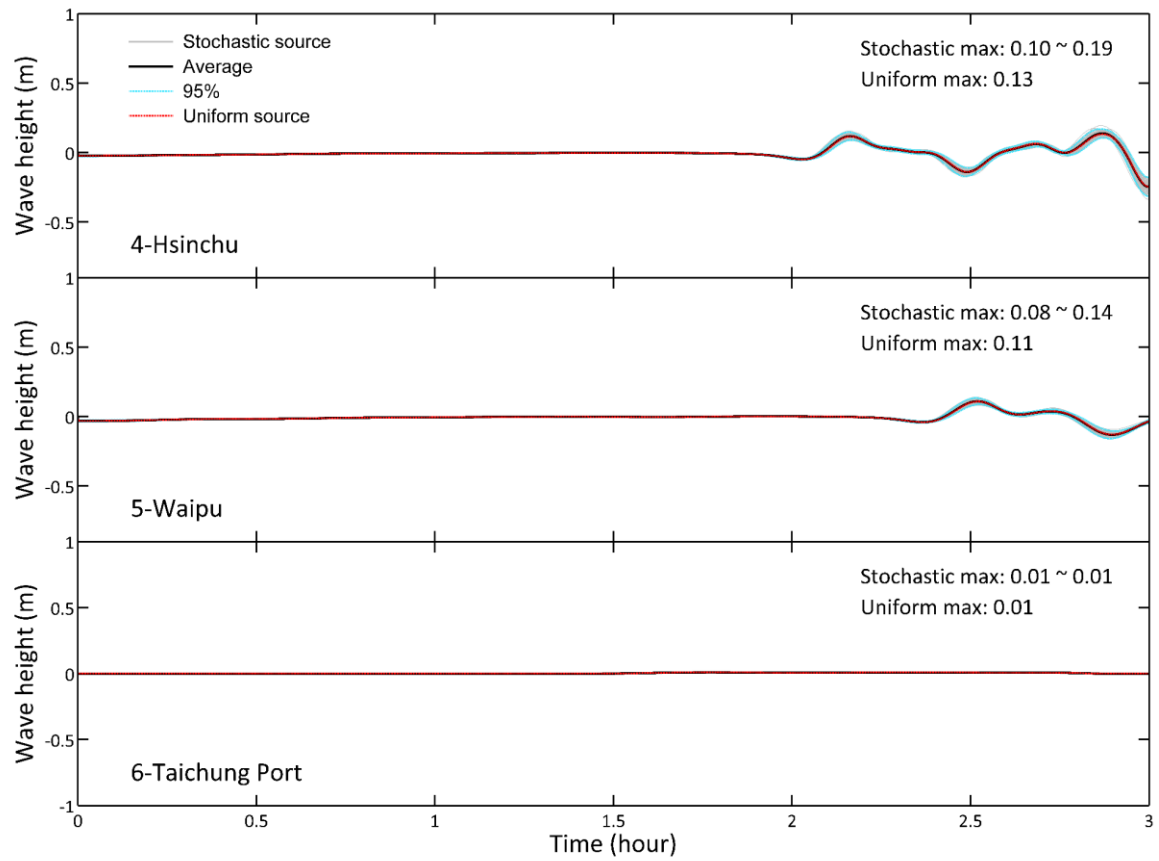

**Fig. 2.** The time series of wave heights recorded at station 4 (Hsinchu), 5 (Waipu) and 6 (Taichung Port).

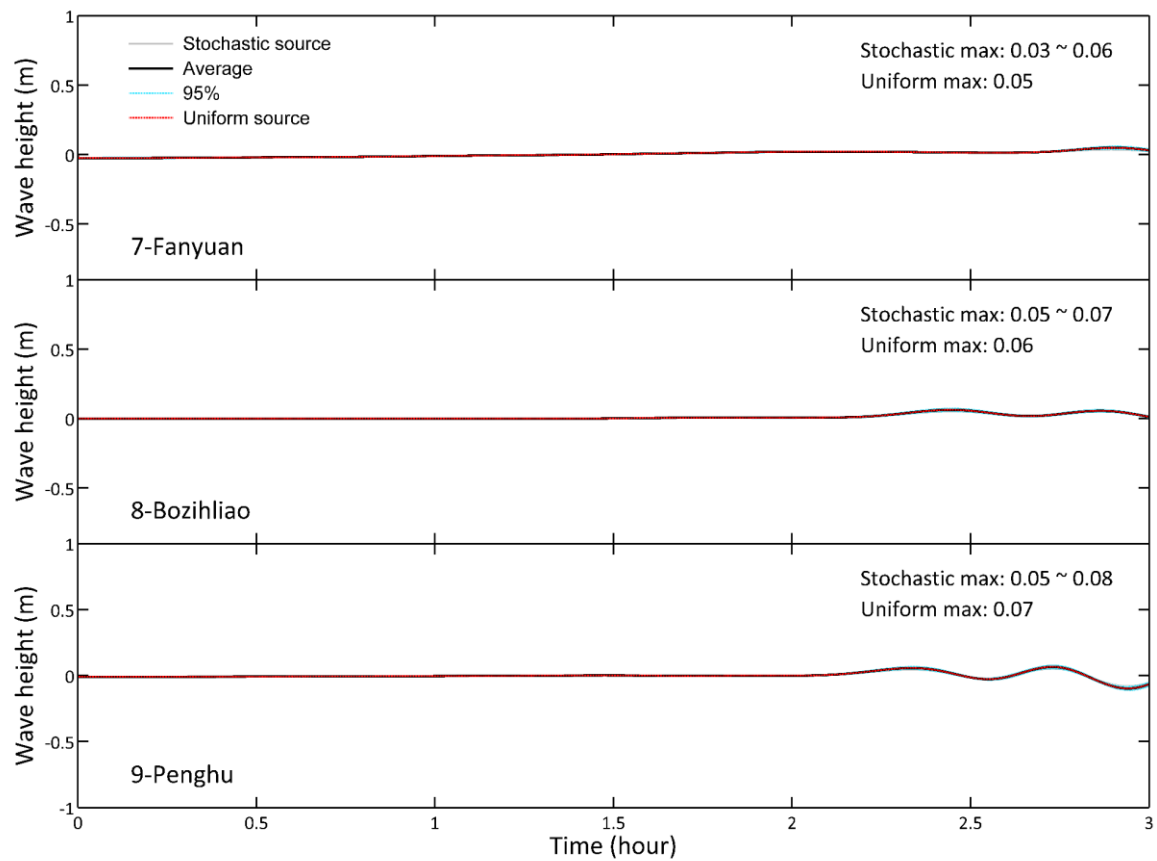

**Fig. 3. The time series of wave heights recorded at station 7 (Fanyuan), 8 (Bozihliao) and 9 (Penghu).**

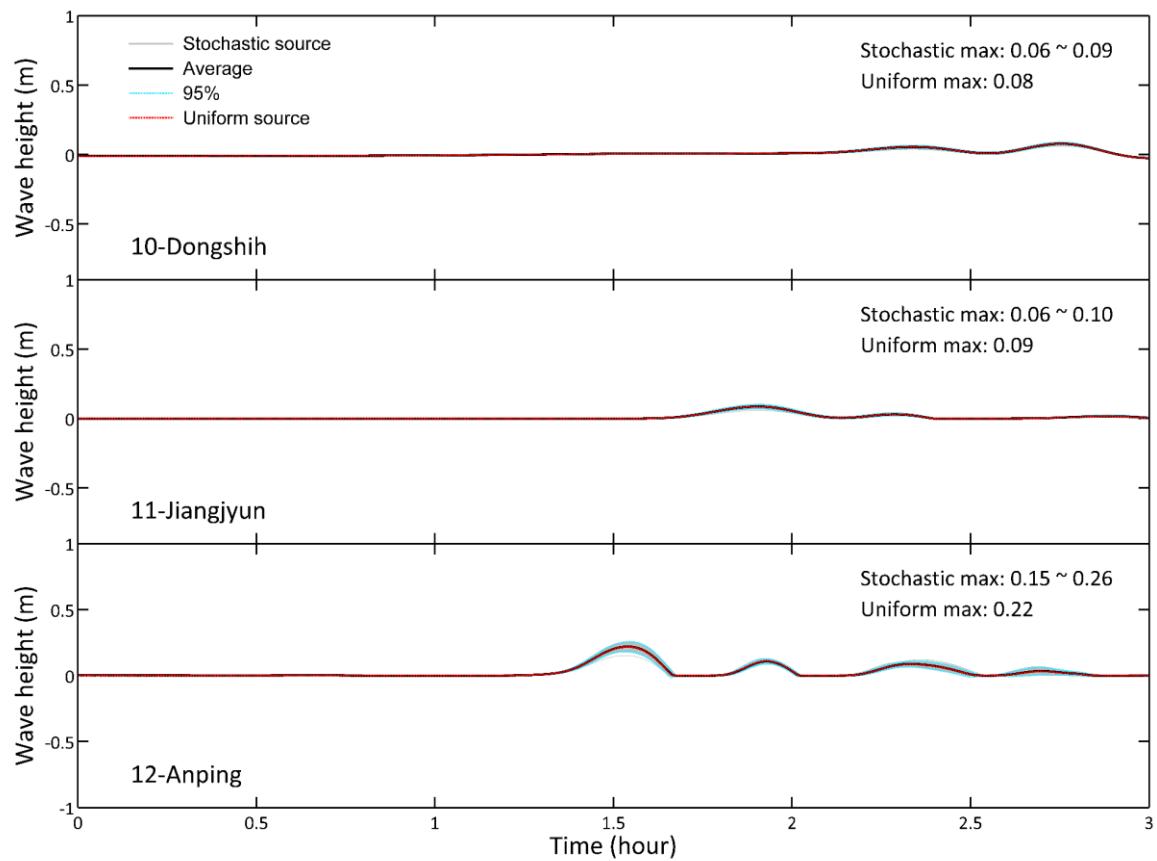

**Fig. 4.** The time series of wave heights recorded at station 10 (Dongshih), 11 (Jiangjyun) and 12 (Anping).

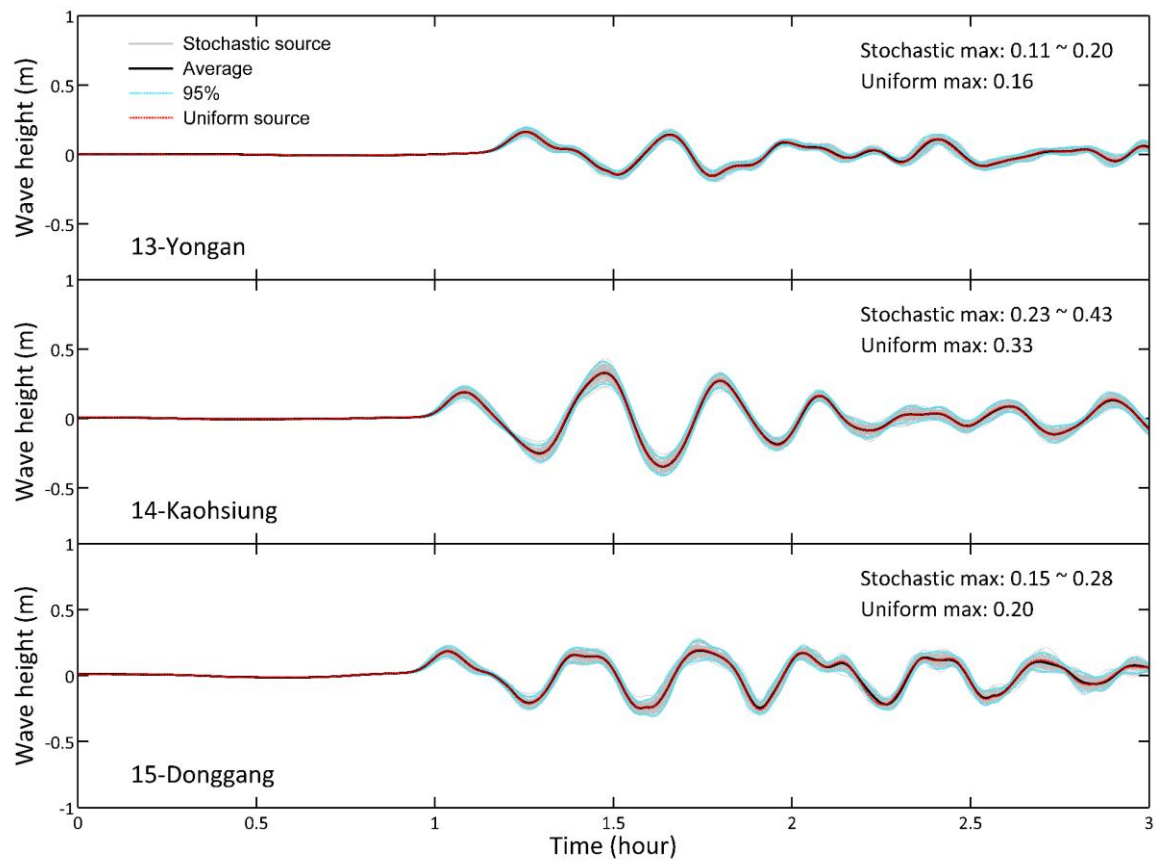

**Fig. 5.** The time series of wave heights recorded at station 13 (Yongan), 14 (Kaohsiung) and 15 (Donggang).

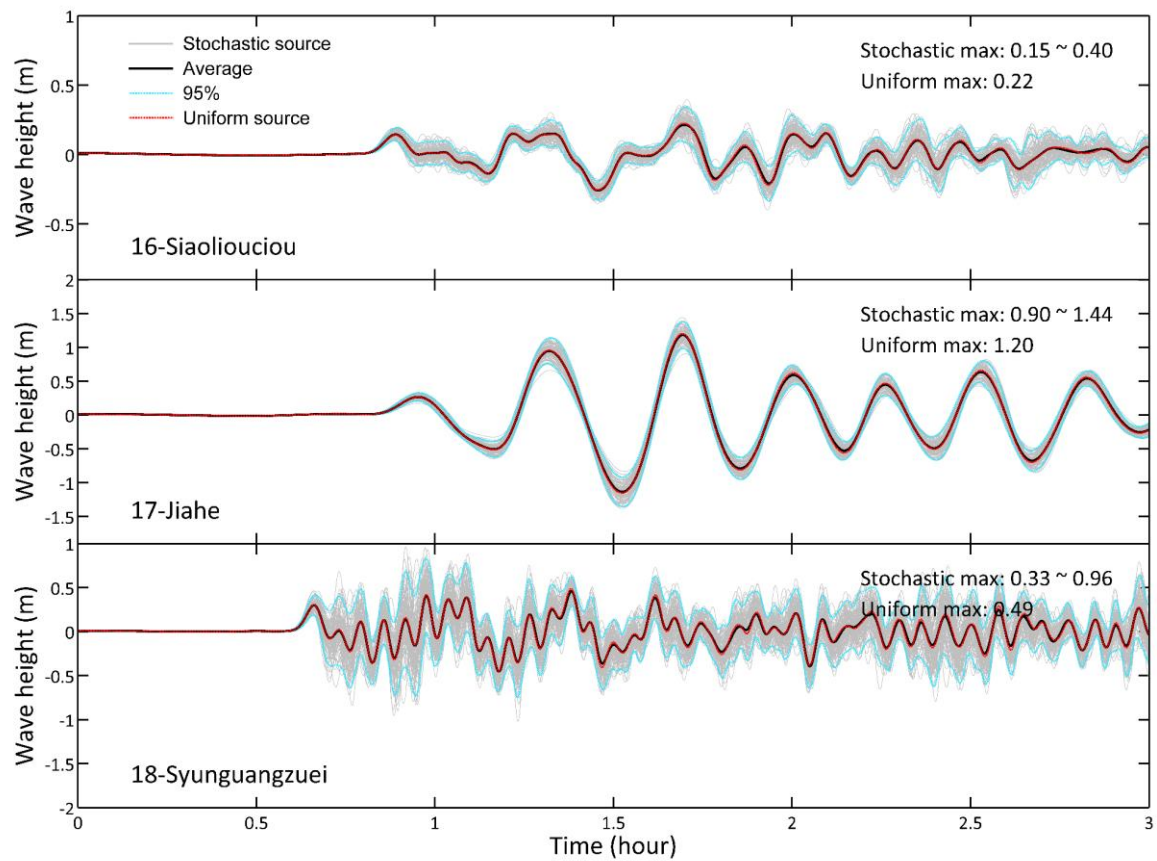

**Fig. 6.** The time series of wave heights recorded at station 16 (Siaoliouciou), 17 (Jiahe) and 18 (Syunguangzuei).

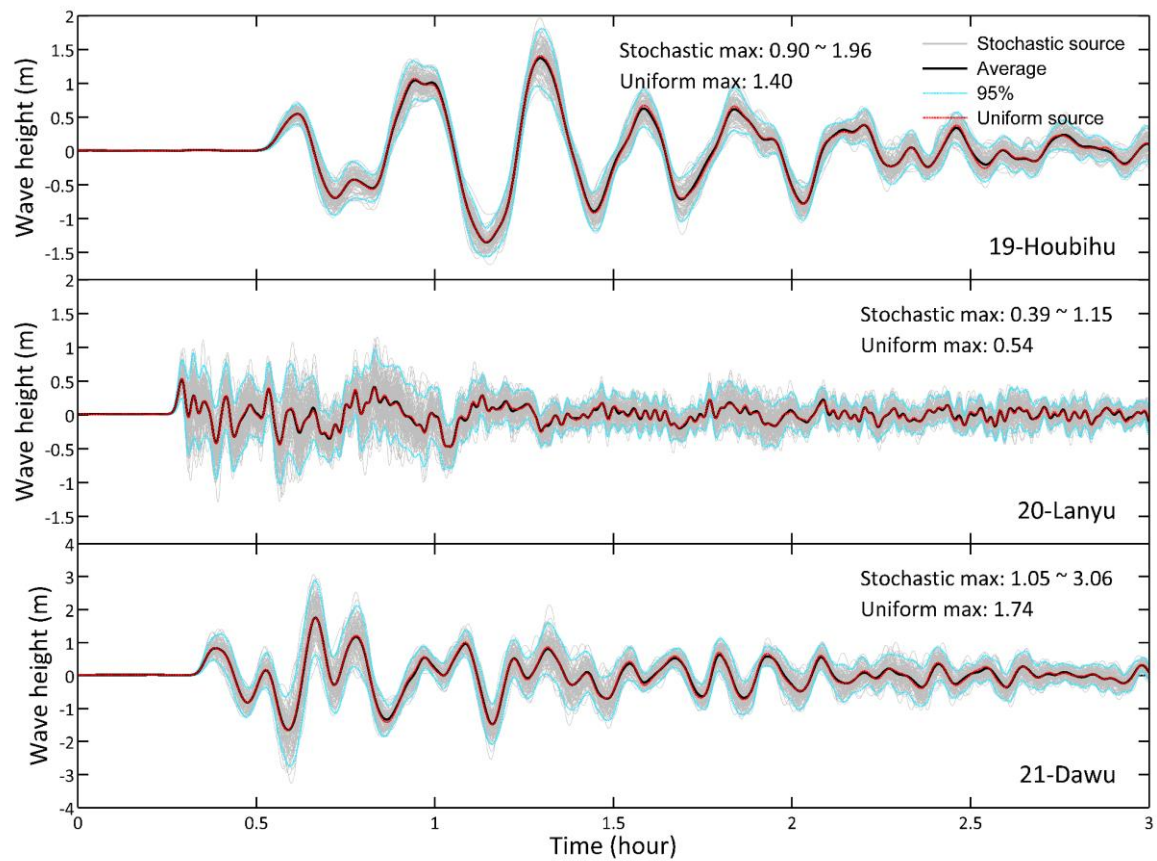

**Fig. 7. The time series of wave heights recorded at station 19 (Houbihu), 20 (Lanyu) and 21 (Dawu).**

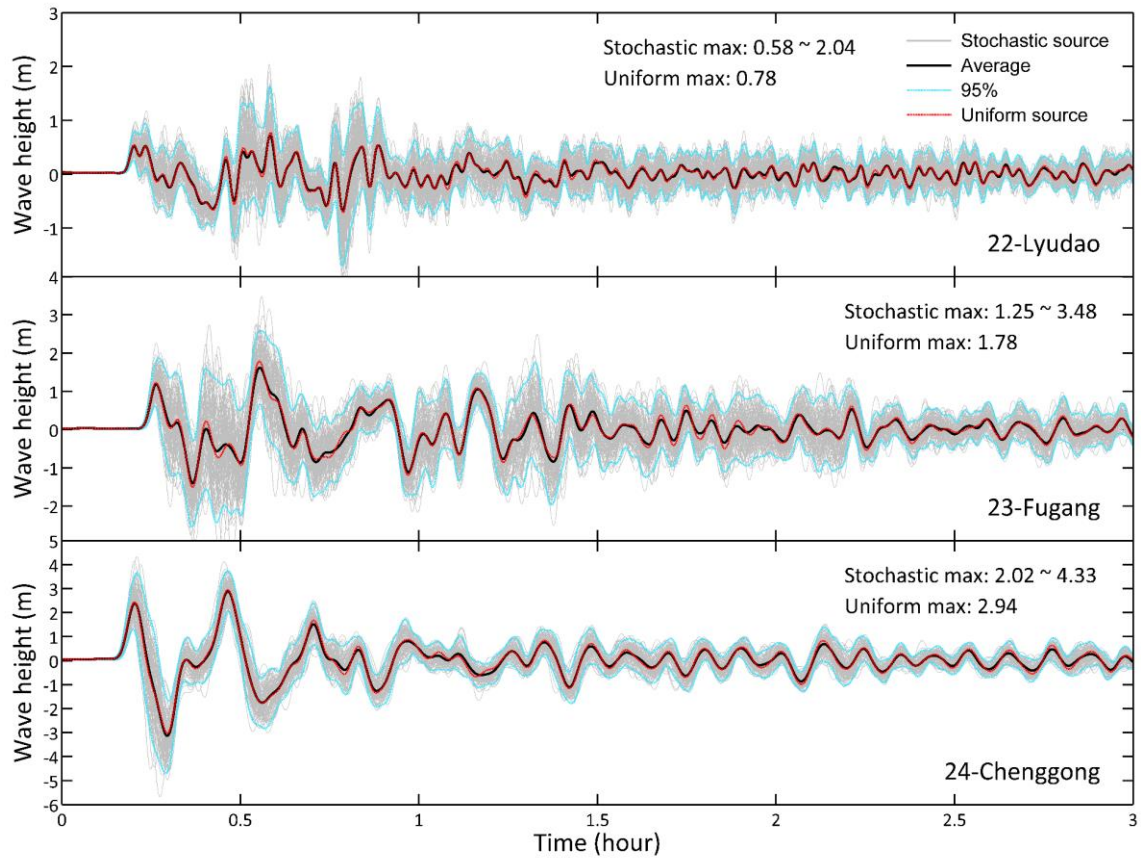

**Fig. 8.** The time series of wave heights recorded at stations 22 (Lyudao), 23 (Fugang) and 24 (Chenggong).



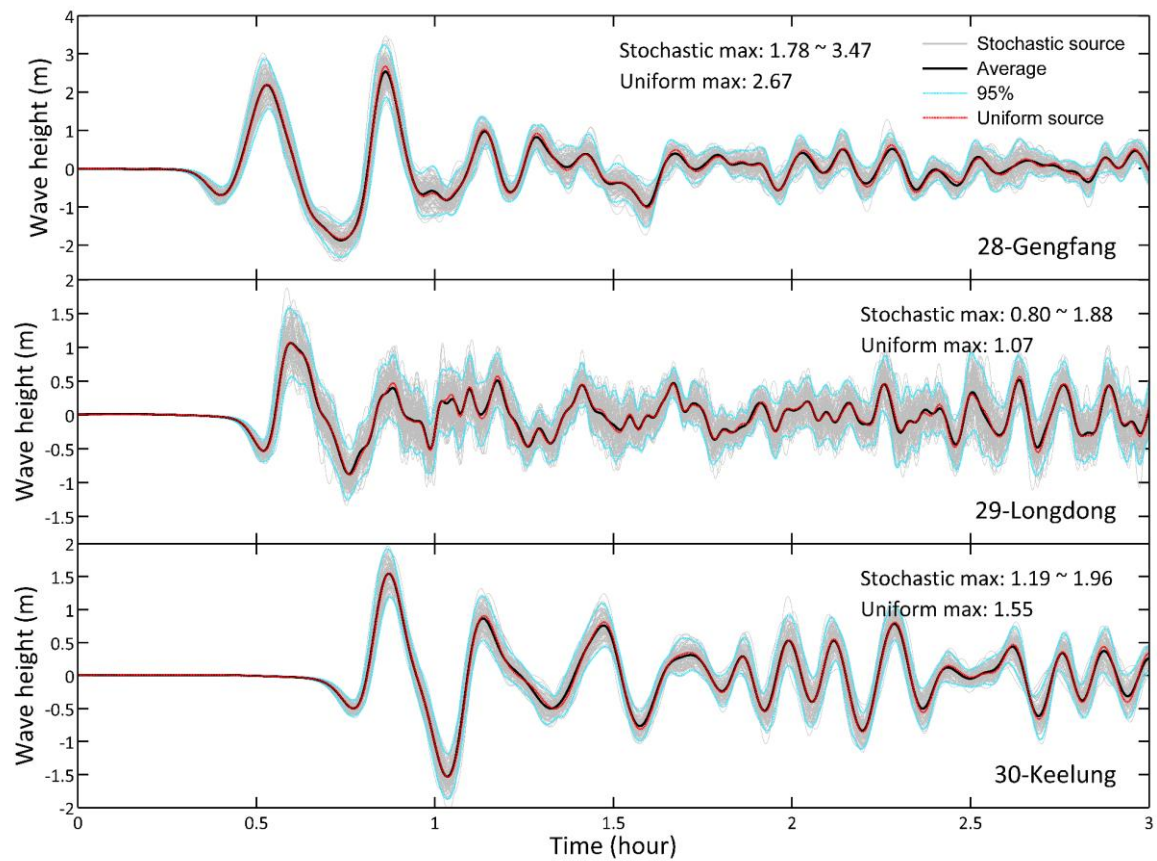

**Fig. 9.** The time series of wave heights recorded at station 28 (Gengfang), 29 (Longdong) and 30 (Keelung).
